# Supplementary material for: Recharge and Geochemical Evolution of Groundwater in Fractured Basement Aquifers (NW India): Insights from Environmental Isotopes (δ18O, δ2H, and 3H) and Hydrogeochemical Studies
Source: MDPI journal article supplement (doi:10.3390/w14030315), 2022-01-21
Supplement: s1 [file s1]

**Table S1.** Physicochemical and isotopic results of groundwater samples collected during post-monsoon season from Ambaji Basin (NW India) (December, 2017)

| Sample ID | Latitude | Longitude | pH   | EC (μS) | TDS (mg/L) | Ca <sup>2+</sup> (mg/L) | Mg <sup>2+</sup> (mg/L) | Na <sup>+</sup> (mg/L) | K <sup>+</sup> (mg/L) | SO <sub>4</sub> <sup>2-</sup> (mg/L) | Cl <sup>-</sup> (mg/L) | NO <sub>3</sub> <sup>-</sup> (mg/L) | HCO <sub>3</sub> <sup>-</sup> (mg/L) | δ <sup>2</sup> H (‰) | δ <sup>18</sup> O (‰) | d-excess (‰) | <sup>3</sup> H (TU) |
|-----------|----------|-----------|------|---------|------------|-------------------------|-------------------------|------------------------|-----------------------|--------------------------------------|------------------------|-------------------------------------|--------------------------------------|----------------------|-----------------------|--------------|---------------------|
| TW-1      | 24.2893  | 72.7434   | 7.09 | 840     | 504        | 73.26                   | 27.41                   | 62.86                  | 2.78                  | 21.64                                | 51.72                  | 22.55                               | 310                                  | -33.57               | -5.08                 | 7.07         | 4.02                |
| TW-2      | 24.2915  | 72.7389   | 6.94 | 1170    | 702        | 77.91                   | 43.44                   | 66.09                  | 2.27                  | 47.18                                | 68.67                  | 43.82                               | 355                                  | -33.11               | -4.95                 | 6.47         | -                   |
| TW-3      | 24.2910  | 72.7257   | 6.94 | 970     | 582        | 90.59                   | 42.19                   | 32.33                  | 1.38                  | 34.66                                | 28.84                  | 6.72                                | 420                                  | -35.83               | -5.07                 | 4.73         | -                   |
| TW-4      | 24.2840  | 72.6958   | 7.38 | 1070    | 642        | 41.13                   | 90.70                   | 54.48                  | 2.97                  | 38.45                                | 70.66                  | 12.07                               | 460                                  | -32.98               | -4.56                 | 3.48         | 28.05               |
| TW-5      | 24.2998  | 72.7146   | 7.12 | 1060    | 636        | 84.81                   | 63.95                   | 37.17                  | 2.59                  | 42.53                                | 58.78                  | 61.57                               | 395                                  | -32.78               | -4.44                 | 2.72         | 2.75                |
| TW-6      | 24.2755  | 72.6855   | 7.05 | 1640    | 984        | 136.91                  | 57.38                   | 104.98                 | 6.77                  | 77.38                                | 184.10                 | 78.49                               | 380                                  | -36.01               | -4.80                 | 2.39         | 3.37                |
| TW-7      | 24.2678  | 72.6783   | 6.91 | 1070    | 642        | 81.55                   | 40.14                   | 48.23                  | 1.39                  | 14.35                                | 32.79                  | 1.53                                | 455                                  | -36.46               | -5.22                 | 5.27         | 2.68                |
| TW-8      | 24.2606  | 72.6828   | 6.81 | 2980    | 1788       | 141.03                  | 111.28                  | 260.15                 | 2.77                  | 195.94                               | 425.70                 | 16.83                               | 535                                  | -32.73               | -4.95                 | 6.83         | -                   |
| BW-9      | 24.2553  | 72.6826   | 6.95 | 2010    | 1206       | 172.96                  | 63.91                   | 166.50                 | 1.78                  | 66.10                                | 307.30                 | 77.42                               | 420                                  | -34.42               | -4.98                 | 5.45         | 1.97                |
| TW-10     | 24.2716  | 72.6703   | 6.95 | 1500    | 900        | 95.34                   | 70.58                   | 119.22                 | 1.77                  | 48.74                                | 136.18                 | 29.66                               | 470                                  | -38.19               | -5.53                 | 6.03         | 3.06                |
| TW-11     | 24.2829  | 72.6725   | 7.07 | 1260    | 756        | 80.35                   | 58.34                   | 76.88                  | 1.42                  | 48.13                                | 101.67                 | 13.00                               | 435                                  | -33.96               | -4.88                 | 5.08         | -                   |
| TW-12     | 24.2951  | 72.6720   | 6.96 | 670     | 402        | 55.27                   | 29.62                   | 40.31                  | 0.83                  | 20.41                                | 42.81                  | 2.30                                | 295                                  | -36.80               | -5.61                 | 8.11         | -                   |
| TW-13     | 24.3213  | 72.6762   | 7.02 | 630     | 378        | 47.89                   | 30.67                   | 37.33                  | 0.73                  | 27.08                                | 36.24                  | 2.11                                | 270                                  | -41.90               | -6.17                 | 7.46         | 6.23                |
| TW-14     | 24.2675  | 72.6670   | 6.60 | 1580    | 948        | 110.76                  | 52.70                   | 42.28                  | 0.83                  | 62.60                                | 159.90                 | 182.48                              | 255                                  | -31.75               | -4.88                 | 7.26         | -                   |
| DW-16     | 24.2767  | 72.6584   | 6.88 | 1660    | 996        | 148.69                  | 53.53                   | 94.38                  | 1.21                  | 53.90                                | 236.11                 | 75.91                               | 335                                  | -32.84               | -4.57                 | 3.75         | -                   |
| TW-17     | 24.2951  | 72.6562   | 6.85 | 1100    | 660        | 97.76                   | 52.13                   | 49.66                  | 3.80                  | 15.51                                | 55.70                  | 21.12                               | 435                                  | -33.82               | -5.10                 | 7.01         | -                   |
| TW-18     | 24.3043  | 72.6583   | 6.91 | 480     | 288        | 39.45                   | 18.13                   | 34.17                  | 0.93                  | 15.10                                | 16.08                  | 11.12                               | 235                                  | -37.33               | -5.36                 | 5.53         | 4.90                |
| DW-19     | 24.2664  | 72.6525   | 6.88 | 2090    | 1254       | 183.60                  | 73.76                   | 106.96                 | 5.00                  | 87.90                                | 311.60                 | 86.54                               | 355                                  | -30.10               | -4.27                 | 4.03         | 1.98                |
| TW-20     | 24.2670  | 72.6486   | 7.03 | 1620    | 972        | 77.94                   | 91.07                   | 114.69                 | 2.57                  | 39.90                                | 146.40                 | 32.77                               | 525                                  | -30.70               | -4.52                 | 5.46         | -                   |
| TW-21     | 24.2526  | 72.6438   | 7.00 | 1180    | 708        | 78.42                   | 58.90                   | 55.75                  | 4.47                  | 40.19                                | 85.82                  | 67.48                               | 340                                  | -33.21               | -4.81                 | 5.31         | 11.89               |
| TW-22     | 24.2648  | 72.6308   | 6.92 | 1010    | 606        | 96.43                   | 33.26                   | 53.31                  | 3.35                  | 27.02                                | 62.37                  | 21.68                               | 335                                  | -35.22               | -5.37                 | 7.73         | 4.71                |
| TW-23     | 24.2764  | 72.6237   | 6.82 | 1070    | 642        | 77.51                   | 33.80                   | 68.98                  | 2.52                  | 22.99                                | 73.72                  | 11.41                               | 365                                  | -36.86               | -5.38                 | 6.22         | -                   |
| TW-24     | 24.2796  | 72.6186   | 6.93 | 1390    | 834        | 108.20                  | 43.66                   | 102.92                 | 2.27                  | 28.18                                | 176.63                 | 13.78                               | 395                                  | -32.22               | -4.65                 | 4.96         | -                   |
| TW-25     | 24.2809  | 72.6112   | 7.11 | 810     | 486        | 75.94                   | 25.42                   | 36.62                  | 2.83                  | 21.61                                | 33.92                  | 48.29                               | 265                                  | -36.42               | -5.23                 | 5.38         | 3.16                |
| TW-26     | 24.2831  | 72.5942   | 7.08 | 1130    | 678        | 86.96                   | 49.24                   | 51.81                  | 5.89                  | 34.41                                | 94.96                  | 11.95                               | 340                                  | -32.51               | -4.99                 | 7.43         | -                   |
| TW-27     | 24.2704  | 72.5754   | 7.15 | 910     | 546        | 85.68                   | 31.65                   | 35.91                  | 2.08                  | 27.13                                | 41.78                  | 68.08                               | 255                                  | -32.68               | -5.00                 | 7.35         | 5.11                |
| TW-28     | 24.2612  | 72.5822   | 7.10 | 1800    | 1080       | 86.47                   | 52.95                   | 165.17                 | 3.58                  | 43.36                                | 207.69                 | 81.08                               | 340                                  | -27.30               | -4.00                 | 4.69         | 2.04                |
| TW-29     | 24.2644  | 72.5577   | 7.30 | 830     | 498        | 86.39                   | 26.92                   | 29.80                  | 1.79                  | 39.57                                | 36.09                  | 99.41                               | 230                                  | -40.06               | -5.98                 | 7.75         | -                   |

|       |         |                |      |        |       |        |        |        |      |        |        |        |        |        |       |      |       |
|-------|---------|----------------|------|--------|-------|--------|--------|--------|------|--------|--------|--------|--------|--------|-------|------|-------|
| TW-30 | 24.2809 | 72.5558        | 6.61 | 1370   | 822   | 100.14 | 47.02  | 85.90  | 2.04 | 34.44  | 151.61 | 27.58  | 325    | -31.99 | -4.53 | 4.28 | 2.10  |
| TW-31 | 24.2863 | 72.5774        | 6.87 | 1030   | 618   | 85.74  | 35.56  | 63.80  | 3.34 | 31.06  | 60.93  | 58.23  | 355    | -32.24 | -4.92 | 7.10 | 2.35  |
| TW-33 | 24.2956 | 72.5953        | 7.19 | 1640   | 984   | 38.17  | 38.23  | 180.89 | 4.18 | 44.82  | 158.48 | 0.61   | 395    | -24.51 | -3.23 | 1.30 | -     |
| TW-34 | 24.3073 | 72.5925        | 6.83 | 1020   | 612   | 83.08  | 41.73  | 52.32  | 2.43 | 24.89  | 44.23  | 1.02   | 410    | -32.20 | -4.93 | 7.27 | 5.93  |
| TW-35 | 24.3030 | 72.6089        | 6.85 | 880    | 528   | 72.21  | 34.08  | 47.06  | 2.80 | 21.09  | 34.93  | 4.44   | 335    | -34.92 | -5.05 | 5.47 | 6.70  |
| TW-36 | 24.2984 | 72.6188        | 6.96 | 1280   | 768   | 86.64  | 63.94  | 62.71  | 4.26 | 44.64  | 79.43  | 1.78   | 445    | -32.51 | -4.57 | 4.08 | -     |
| TW-37 | 24.3016 | 72.6300        | 7.13 | 1480   | 888   | 57.84  | 87.50  | 114.34 | 3.01 | 37.17  | 102.87 | 23.49  | 510    | -29.59 | -3.92 | 1.81 | -     |
| TW-38 | 24.3063 | 72.6276        | 6.70 | 360    | 216   | 21.92  | 11.94  | 28.70  | 0.50 | 12.29  | 25.14  | 1.85   | 125    | -36.73 | -5.42 | 6.66 | 3.09  |
| TW-40 | 24.2838 | 72.6404        | 6.96 | 1080   | 648   | 86.49  | 59.80  | 51.99  | 2.52 | 26.56  | 50.80  | 15.51  | 445    | -36.67 | -5.05 | 3.75 | 2.62  |
| TW-41 | 24.3056 | 72.6828        | 7.15 | 670    | 402   | 47.28  | 35.09  | 43.32  | 1.63 | 32.02  | 45.56  | 2.44   | 245    | -30.42 | -4.03 | 1.81 | -     |
| TW-42 | 24.3257 | 72.6711        | 7.11 | 1900   | 1140  | 81.70  | 42.89  | 43.42  | 7.27 | 23.37  | 47.93  | 24.88  | 350    | -37.32 | -5.32 | 5.22 | -     |
| TW-43 | 24.3072 | 72.7695        | 6.78 | 1020   | 612   | 101.06 | 34.21  | 44.13  | 1.06 | 50.16  | 114.25 | 10.45  | 225    | -40.30 | -6.03 | 7.91 | 3.64  |
|       |         | <b>Minimum</b> | 6.60 | 360    | 216   | 21.92  | 11.94  | 28.70  | 0.50 | 12.29  | 16.08  | 0.61   | 125    | -41.90 | -6.17 | 1.30 | 1.97  |
|       |         | <b>Maximum</b> | 7.38 | 2980   | 1788  | 183.60 | 111.28 | 260.15 | 7.27 | 195.94 | 425.70 | 182.48 | 535    | -24.51 | -3.23 | 8.11 | 28.05 |
|       |         | <b>Average</b> | 6.97 | 1231.5 | 738.9 | 87.04  | 48.97  | 74.19  | 2.69 | 40.61  | 105.01 | 34.34  | 359.25 | -34.03 | -4.93 | 5.44 | 5.10  |

---
